# Supplementary material for: Potential use of kraft and organosolv lignins as a natural additive for healthcare products
Source: Royal Society of Chemistry journal article supplement (doi:10.1039/c8ra02255k), 2018-01-01
Supplement: c8ra02255k1.pdf [file c8ra02255k1.pdf]

## Supporting information

### DOVE body milk (negative control)

Aqua, Ethylhexyl Cocoate, Cyclopentasiloxane, Glycerin, Paraffinum Liquidum, Cetyl PEG/PPG-10/1 Dimethicone, BHT, Cera Microcristalina, Disodium Phosphate, Helianthus Annuus Hibrid Oil, isomerized linoleic acid, methylparaben, parfum, pentaerythrityl, tetra-di-t-butyl hydroxyhydrocinnamate, phenoxyethanol, propylparaben, tocopheryl acetate, alpha-isomethyl ionone, benzyl alcohol, butylphenyl, methylpropional, citronellol, coumarin, geraniol, hexyl cinnamal, limonene, linalool.

### DELIAL SPF 10 (positive control)

Aqua, octocrylene, alcohol, glycerin, C12-15 alkyl benzoate, ethylhexyl salicylate, butyl methoxydibenzoylmethane, titanium dioxide (nano), vp/hexadecane copolymer, propylheptyl caprylate, phenoxyethanol, stearyl dimethicone, panthenol, tocopheryl acetate, parfum, acrylated/C10-30 acrylate crosspolymer, silica, sodium hydroxide, xanthan gum, disodium EDTA, linalool, dimethicone, limonene, benzyl salicylate, eugenol, citronellol, coumarin, tocopherol.

### DELIAL SPF 20 (positive control)

Aqua, alcohol, C12-15 alkyl benzoate, octocrylene, glycerin, ethylhexyl salicylate, butyl methoxydibenzoylmethane, vp/hexadecane copolymer, triacontanyl PVP, propylheptyl caprylate, acrylates copolymer, tocopheryl acetate, microcristaline cellulose, parfum, phenylbenzimidazole sulfonic acid, mica, caprylyl glycol, xanthan gum, sodium hydroxide, acrylated/C10-30 acrylate crosspolymer, ethylhexyl glycerin, CI 77891, galactoarabinan, hydroxyacetophenone, disodium EDTA, cellulose gum, CI 77492, CI 77499, tocopherol, CI 15985.

### DELIAL SPF 50 (positive control)

Aqua, homosolate, octocrylene, alcohol denat, butyl methoxydibenzoylmethane, ethylhexyl silicate, 4-methylbenzylidene camphor, cocoglycerides, dibutyl adipate, glycerin, titanium dioxidemagnesium aluminium silicate, PEG-100 stearate, caprate, capryl glycol, sucrose stearate, jojoba, stearic acid, alumina, xanthan gum, glyceryl caprylate, squalante, tocopherol phosphate, dipotassium salt, helianthus annus (sunflower) seed oil, ascorbyl palmitate, tocopheryl acetate, disodium EDTA, triethanolamine, parfum, alpha isomethyl ionone, benzyl silicate, butylphenyl methylpropional, cinnamyl alcohol, citronellol, coumarin, geraniol, linalool, BHT.
